# Supplementary material for: Fungal co-infection in COVID-19 patients: evidence from a systematic review and meta-analysis
Source: publisher site journal article supplement (doi:10.18632/aging.202742), 2021-03-19
Supplement: Supplementary file [file aging-v13i6-202742-supplementary-material-SD1.pdf]

**SUPPLEMENTARY FIGURES**

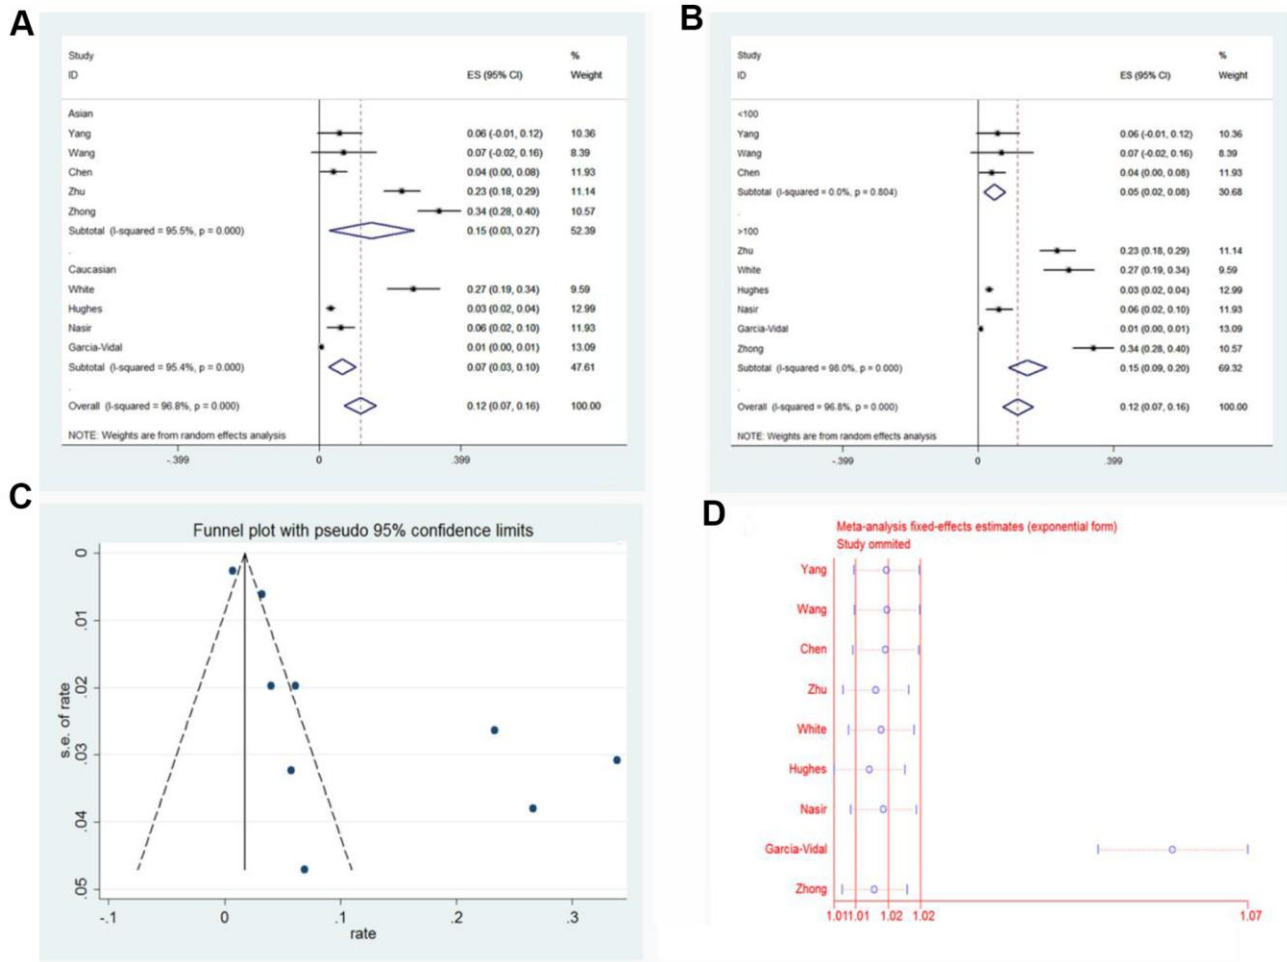

**Supplementary Figure 1. The association of fungal infection in COVID-19 patients. (A, B) Forest plot of fungal infection in COVID-19 patients (A) Race subgroup analysis (B) Case size subgroup analysis (C) The funnel plot of fungal infection in COVID-19 patients (D) Sensitivity analysis of fungal infection in COVID-19 patients.**

**A**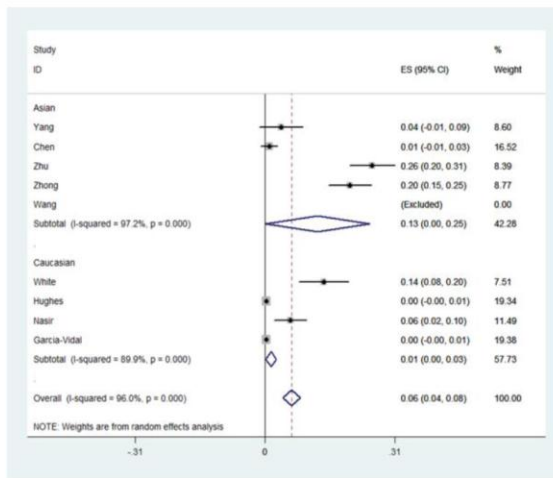**B**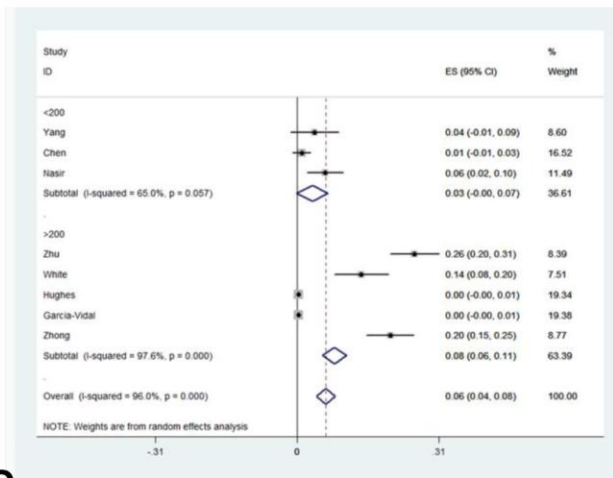**C**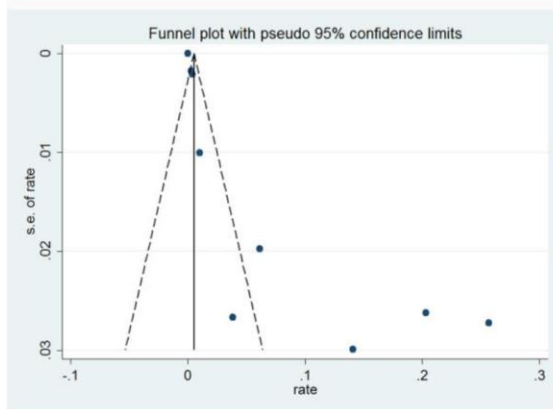**D**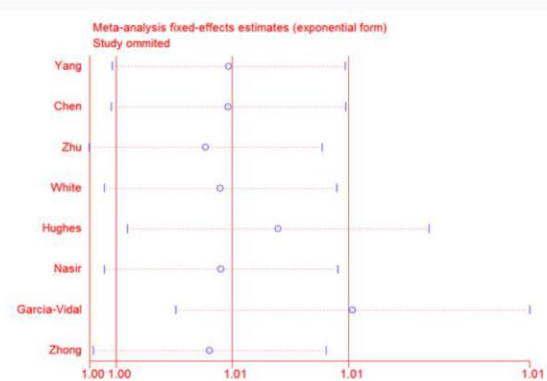

**Supplementary Figure 2. The association of aspergillus infection in COVID-19 patients. (A, B) Forest plot of aspergillus infection in COVID-19 patients (A) Race subgroup analysis (B) Case size subgroup analysis (C) The funnel plot of aspergillus infection in COVID-19 patients (D) Sensitivity analysis of aspergillus infection in COVID-19 patients.**

**A**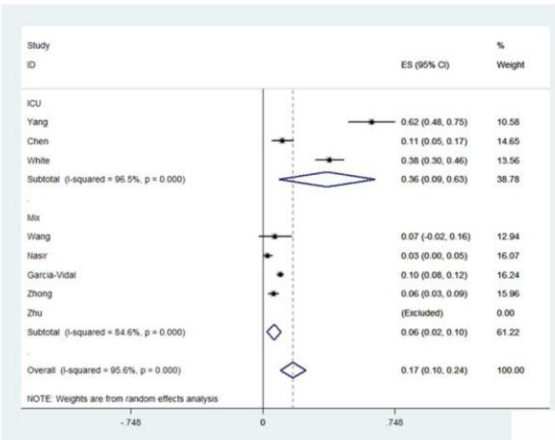**B**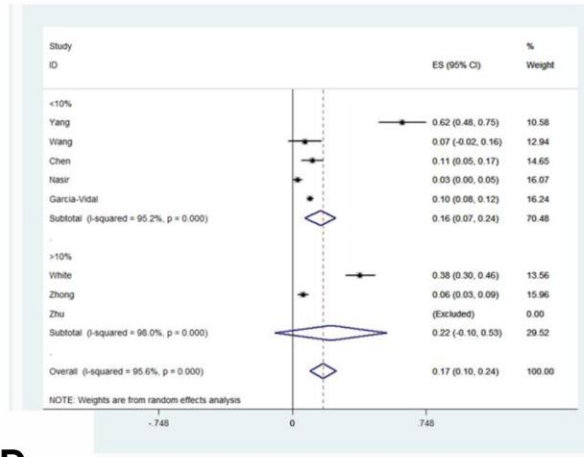**C**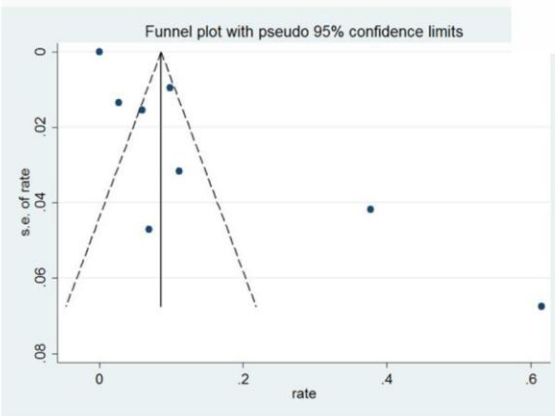**D**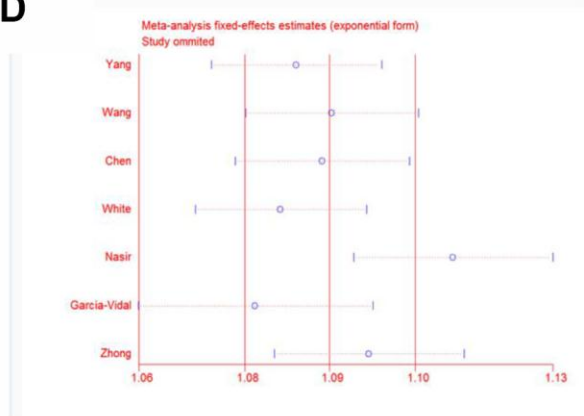

**Supplementary Figure 3. The association of mortality in fungal co-infections and COVID-19 patients. (A, B) Forest plot of mortality in fungal co-infections and COVID-19 patients (A) Severity subgroup analysis (B) Case size subgroup analysis (C) The funnel plot of mortality in fungal co-infections and COVID-19 patients (D) Sensitivity analysis of mortality in fungal co-infections and COVID-19 patients.**
